# Supplementary material for: Cooperative C–F⋯Si interaction in optically active helical polysilanes
Source: Royal Society of Chemistry journal article supplement (doi:10.1039/b314723a), 2004-01-01
Supplement: b314723a.doc [file b314723a.doc]

**Electronic Supplementary Information(ESI)**


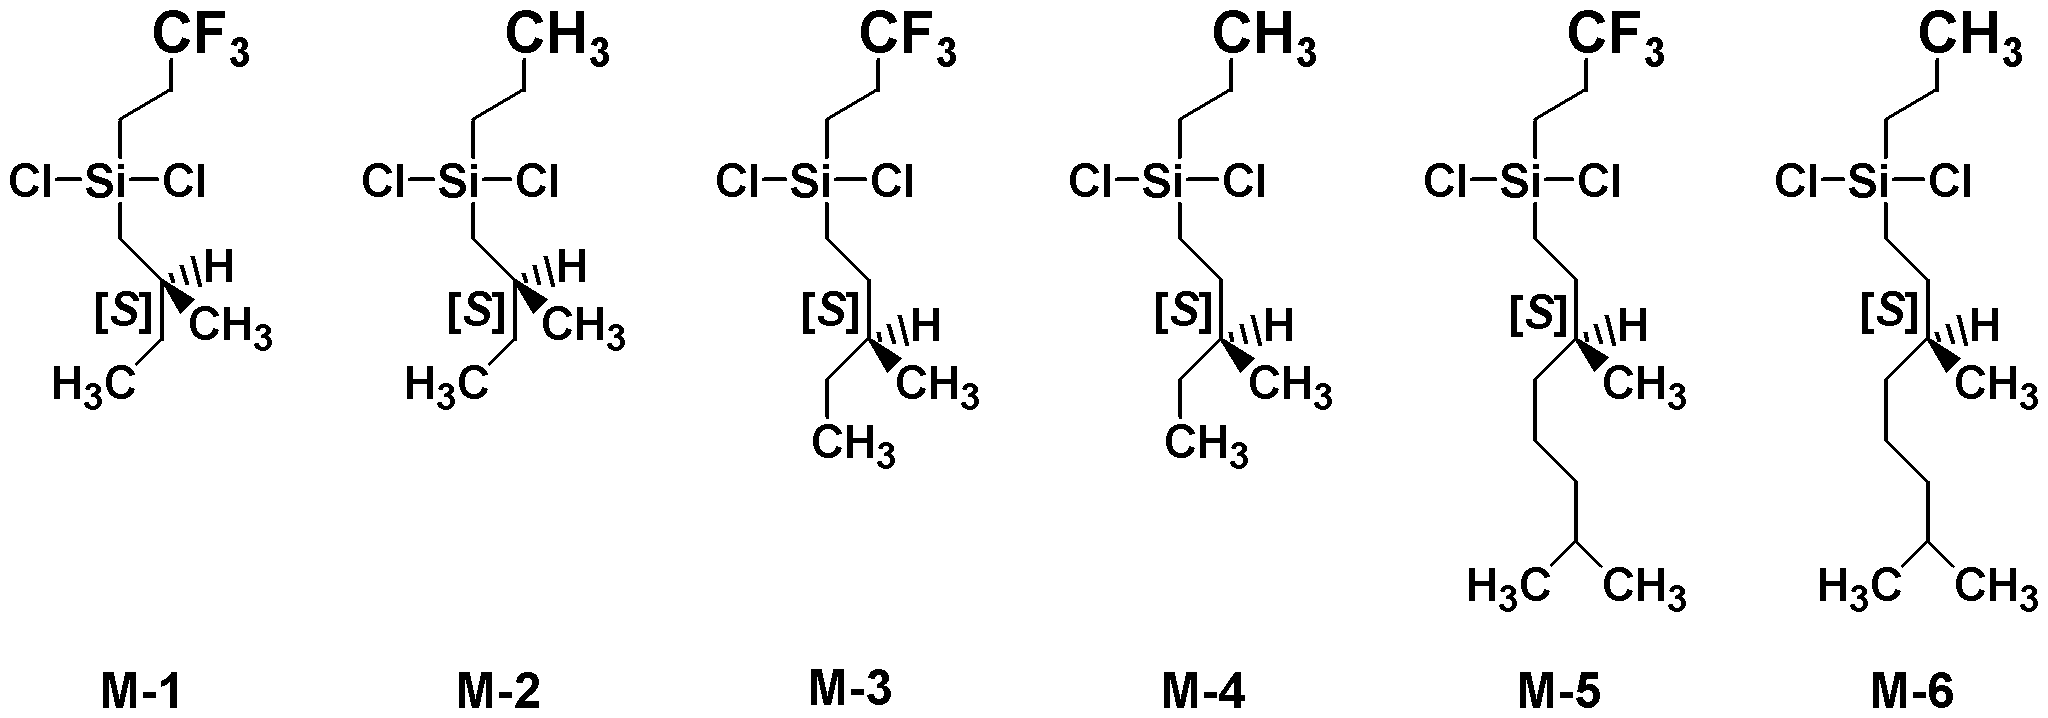
Experimental Section

# Synthesis of monomers

3,3,3-Trifluoropropyl-(*S*)-2-methylbutyldichlorosilane (**M-1**); (*S*)-2-Methylbutylchloride (20.3 g, 190 mmol) was reacted with Mg (5.5 g, 228 mmol) in dry tetrahydrofuran (100 mL) at 50 °C. The Grignard reagent was added to 3,3,3-trifluoropropyltrichlorosilane (40.0 g, 173 mmol) in dry tetrahydrofuran (100 mL) at 50 °C. The salts were removed by filtration from the reaction mixture. The crude product was purified by distillation to give the desired monomer as colorless liquid in 65% yield. b.p. = 106-108 °C (50 mmHg), 13C NMR in CDCl3 (ppm) : 11.15, 13.42 (CF3CH2***C***H2), 21.78, 27.67 (CF3***C***H2CH2), 27.84, 30.20, 32.30, 127.00 (***C***F3CH2CH2), 29Si NMR in CDCl3 (ppm) : 31.41, 19F NMR in CDCl3 (ppm) : -69.61 (reference: CF3C6H5(-64 ppm)), []D24 = 9.61°(neat).

**M-2**; b.p. = 116-118°C (50 mmHg), 13C NMR in CDCl3 (ppm) : 11.22, 16.17, 17.24, 21.82, 23.65, 28.13, 30.22, 32.35, 29Si NMR in CDCl3 (ppm) : 32.90, []D25 = 12.15°(neat).

**M-3**; b.p. = 110-111°C (30 mmHg), 13C NMR in CDCl3 (ppm) : 11.27, 12.36 (CF3CH2***C***H2), 17.26, 18.54, 27.60 (CF3***C***H2CH2), 28.43, 28.64, 36.34, 127.96 (***C***F3CH2CH2), 29Si NMR in CDCl3 (ppm) : 32.38, 19F NMR in CDCl3 (ppm) : -69.63 (reference: CF3C6H5(-64ppm)), []D24 = 6.66°(neat).

**M-4**; b.p. = 118-119 °C (30 mmHg), 13C NMR in CDCl3 (ppm) :11.30, 16.12, 17.21, 17.56, 18.60, 22.56, 28.63, 28.68, 36.39, 29Si NMR in CDCl3 (ppm) : 33.88, []D24 = 7.72°(neat).

**M-5**; b.p. = 130-133 °C (10 mmHg), 13C NMR in CDCl3 (ppm) :12.34 (CF3CH2***C***H2), 17.24, 18.99, 22.58, 22.67, 24.68, 27.60 (CF3***C***H2CH2), 27.94, 28.90, 34.72, 36.37, 39.23, 126.95 (***C***F3CH2CH2), 29Si NMR in CDCl3 (ppm) : 32.38, 19F NMR in CDCl3 (ppm) : -69.67 (reference: CF3C6H5(-64ppm)), []D24 = 1.93°(neat).

**M-6**; b.p. = 139-141°C (10 mmHg), 13C NMR in CDCl3 (ppm) :16.14, 17.21, 17.54, 19.06, 22.58, 22.60, 22.70, 24.71, 27.95, 29.10, 34.77, 36.43, 39.27, 29Si NMR in CDCl3 (ppm) : 33.88, []D24 = 2.00°(neat).

# Synthesis of polymers

Poly[3,3,3-trifluoropropyl-(*S*)-2-methylbutyldichlorosilane] (**PS-1**); Fleshly distilled monomer(**M-1**) (10 g, 37.5 mmol) was added dropwise to 1.81 g (78.7 mmol) of Na metal suspended in 30 mL of refluxing *n*-nonane vigorously stirred under nitrogen atmosphere. After 2 h, the reaction mixture was cooled to room temperature and 100 mL of dry tetrahydrofuran was added to reduce solution viscosity and stirring was continued for a further 30 min. The reaction mixture was passed through a 2-m PTFE filter under nitrogen gas pressure. To the clear filtrate, 2-propanol and ethanol as precipitating solvents were added carefully. Several portions of white precipitates were collected by centrifugation and dried *in vacuo* at 80 °C.

|  | **PS-1** | **PS-2** | **PS-3** | **PS-4** | **PS-5** | **PS-6** |
| --- | --- | --- | --- | --- | --- | --- |
| Yield (%) | 0.8 | 8.5 | 0.8 | 9.0 | 5.3 | 5.5 |
| *Mw* | 5,000 | 4,500 | 17,000 | 1,630,000 | 330,000 | 1,540,000 |
| *Mw/Mn* | 1.27 | 1.16 | 1.84 | 2.53 | 3.06 | 2.59 |

# Measurements

UV and CD absorption spectra were recorded simultaneously on a *JASCO* J-725 spectropolarimeter equipped with a liquid nitrogen-controlled quartz cell with path length of 5 mm in a cryostat, ranging from 20 °C to -40 °C, or a Peltier-controlled quartz cell with path length of 10 mm, ranging from 80 °C to -5 °C. A scanning condition was as follows: a scanning rate of 200 nm per min, band width of 1 nm, response time of 1 sec, and five times accumulations. Solution temperature in the cryostat was monitored by directly immersing a thermocouple into the solution, while solution temperature in the Peltier-controlled cell was regarded as the same cell housing made of aluminum block. FL spectrum at room temperature (23 °C) was obtained with a *JASCO* FP-6500 spectrofluorometer equipped with a quartz cell with path length of 10 mm. A scanning condition is as follows: a scanning rate of 100 nm per min, band width of 1 nm at excitation and emission, response time of 1 sec, and single accumulation. 13C and 29Si NMR spectra were measured in CDCl3 with a *JEOL* EX-400 spectrometer using tetramethylsilane as an internal standard. Optical rotation at Na-D line was measured with a *JASCO* P-1020 polarimeter using a quartz cell with path length of 10 mm at room temperature (24 °C). The weight-average molecular weight of polymer (*Mw*) and number-average molecular weight of polymer (*Mn*) were determined using a gel permeation chromatography (Shimadzu A10 instruments, Plgel 10m MIXED-B as a column and HPLC-grade tetrahydrofuran as eluent) at 40 °C, based on a calibration with polystyrene standards. IR spectra were measured with Horiba FT-730.


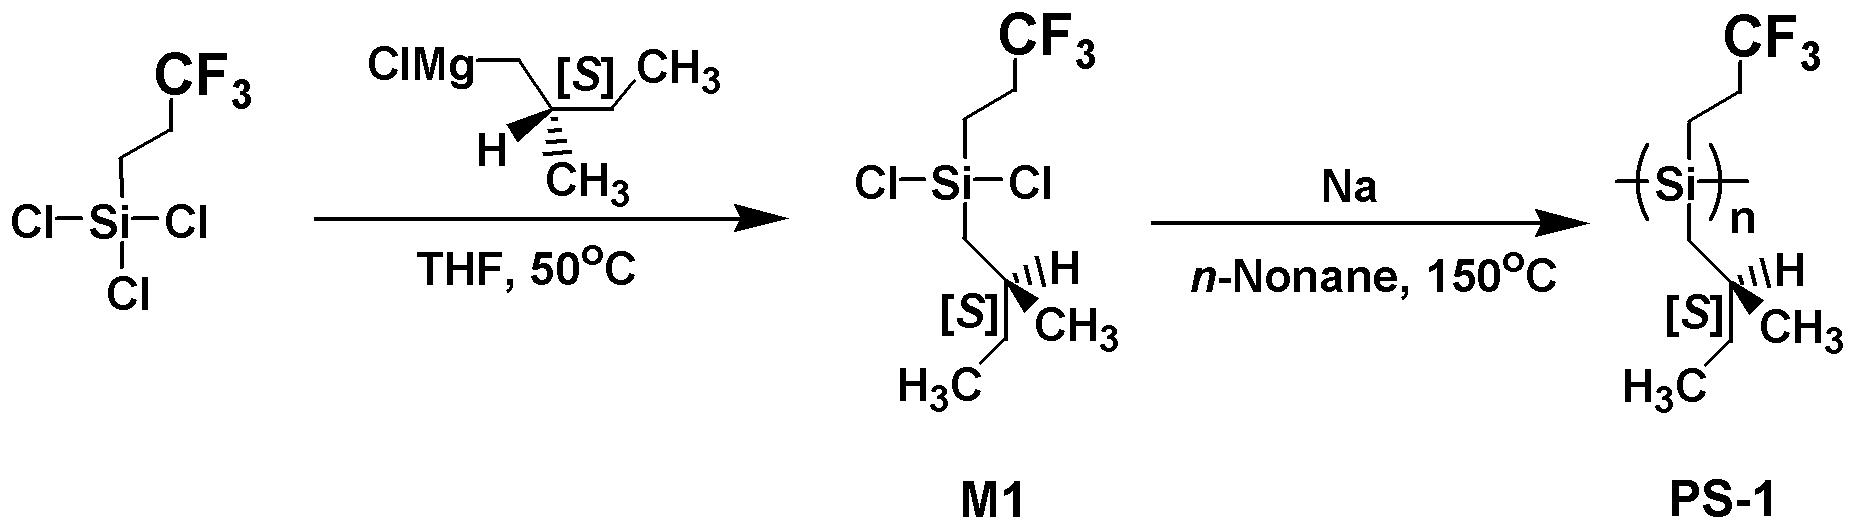


**Scheme S1** Synthetic route of **M1** and **PS-1**.


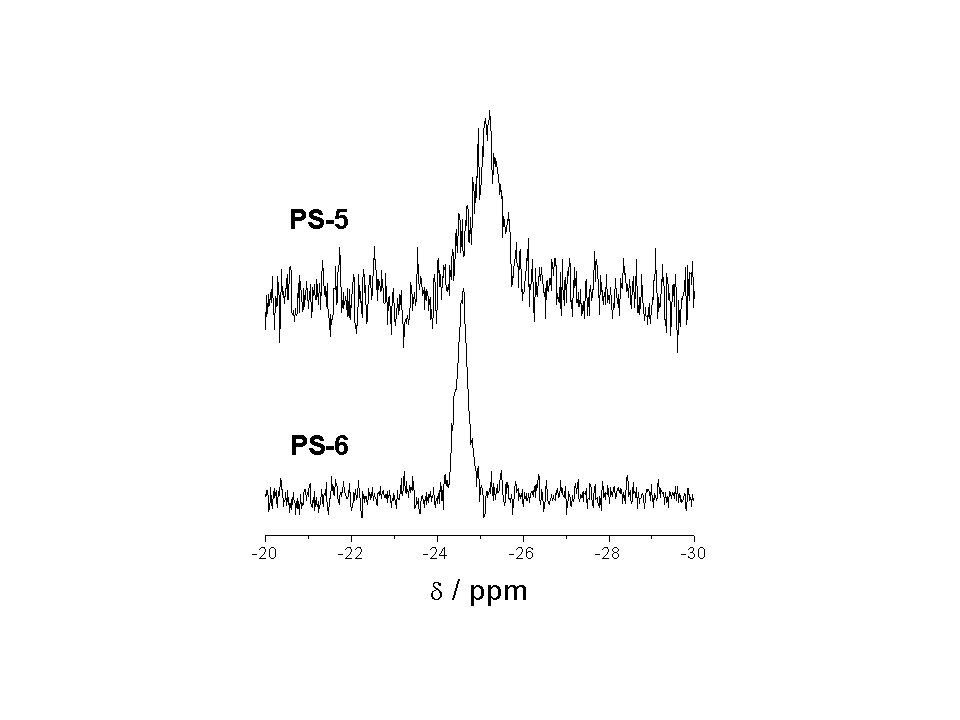


**Fig. S1** 29Si NMR spectra of **PS-5** and **PS-6** in CDCl3 at 30 oC.


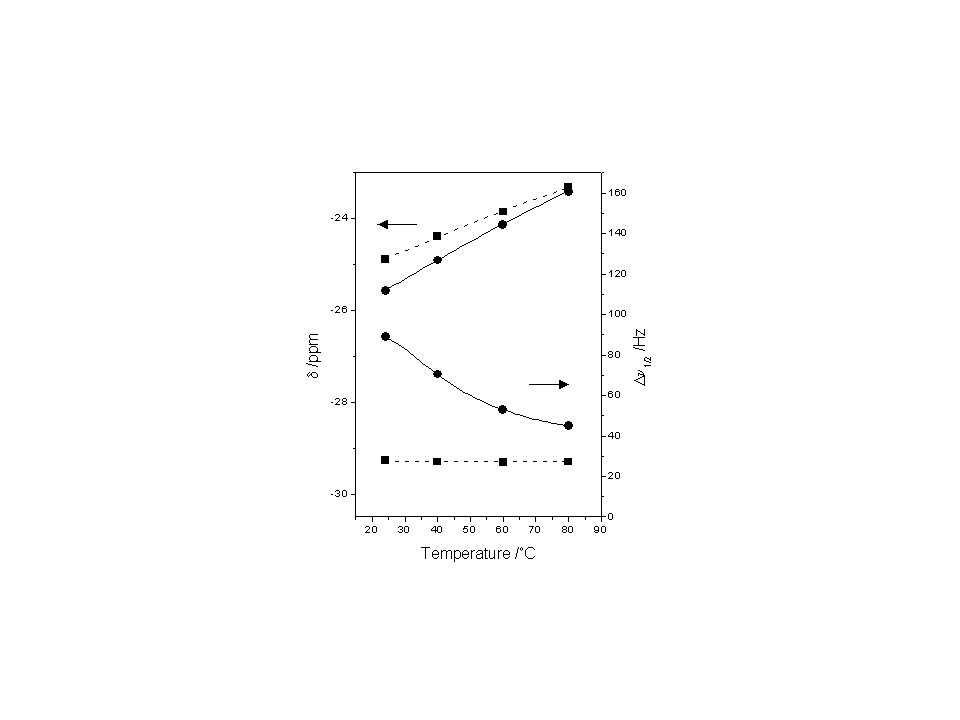


**Fig. S2** Variable-temperature 29Si NMR of **PS-5**(circles, solid line) and **PS-6**(squares, dash line) in toluene-d8 (reference: Hexamethyldisilane(-20.5ppm)).


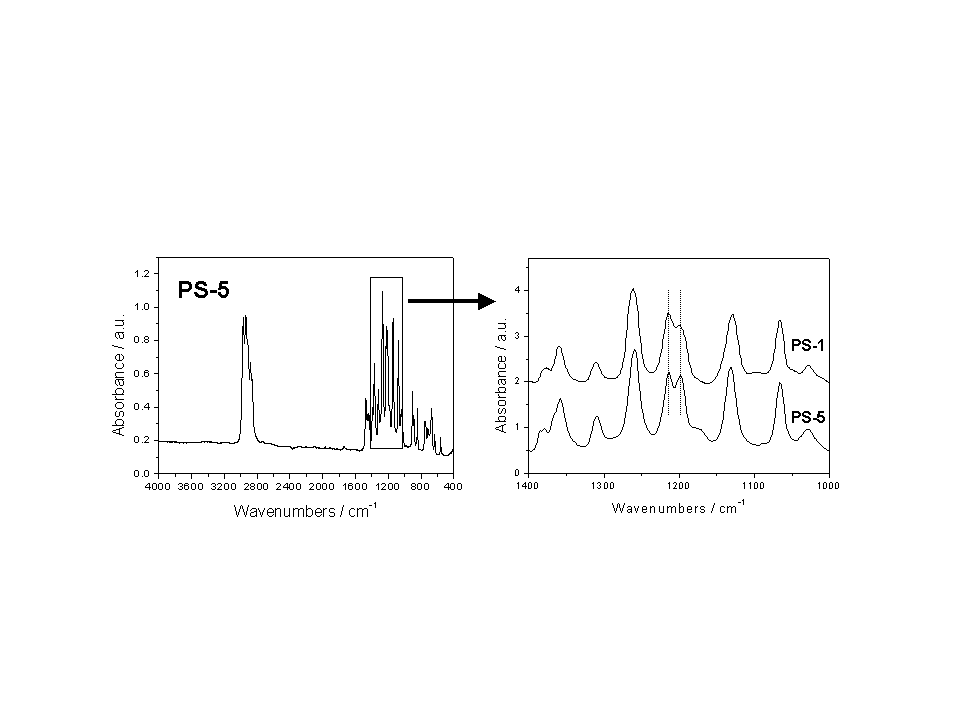


**Fig. S3** IR spectra of **PS-5** cast from THF solution (with that of **PS-1** for comparison).


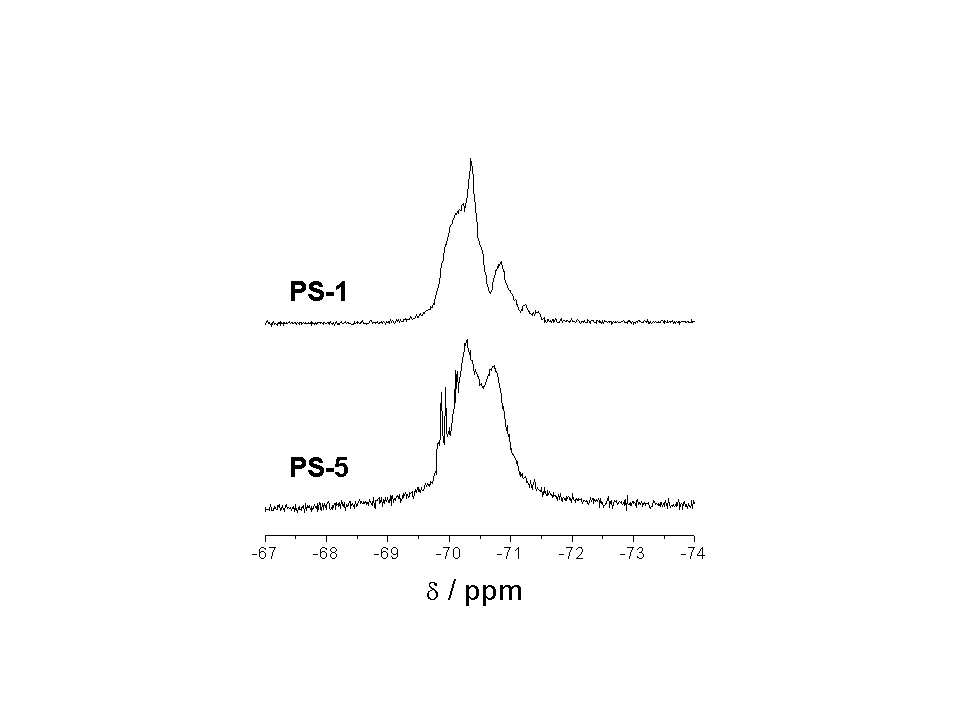


**Fig. S4** 19F NMR spectra of **PS-1** and **PS-5** in CDCl3 at 25 oC, In **PS-5**, 4*J*Si-F = 34.7 Hz at 69.9 ppm and 5*J*Si-F = 13.9 Hz at 70.1 ppm.
